# Supplementary material
Source: publisher figshare collection journal article supplement (https://acs.figshare.com/ndownloader/files/4484962)
Supplement: Supplementary file 1 [file 4484962]

  
data_6 
  
_audit_creation_method            SHELXL-97 
_chemical_name_systematic 
; 
 ? 
; 
_chemical_name_common             ? 
_chemical_melting_point           ? 
_chemical_formula_moiety          ? 
_chemical_formula_sum 
 'C22 H34 N4 O4' 
_chemical_formula_weight          418.53 
  
loop_ 
 _atom_type_symbol 
 _atom_type_description 
 _atom_type_scat_dispersion_real 
 _atom_type_scat_dispersion_imag 
 _atom_type_scat_source 
 'C'  'C'   0.0033   0.0016 
 'International Tables Vol C Tables 4.2.6.8 and 6.1.1.4' 
 'H'  'H'   0.0000   0.0000 
 'International Tables Vol C Tables 4.2.6.8 and 6.1.1.4' 
 'N'  'N'   0.0061   0.0033 
 'International Tables Vol C Tables 4.2.6.8 and 6.1.1.4' 
 'O'  'O'   0.0106   0.0060 
 'International Tables Vol C Tables 4.2.6.8 and 6.1.1.4' 
  
_symmetry_cell_setting            Monoclinic 
_symmetry_space_group_name_H-M    P2(1)/c 
  
loop_ 
 _symmetry_equiv_pos_as_xyz 
 'x, y, z' 
 '-x, y+1/2, -z+1/2' 
 '-x, -y, -z' 
 'x, -y-1/2, z-1/2' 
  
_cell_length_a                    7.990(3) 
_cell_length_b                    6.322(2) 
_cell_length_c                    20.989(8) 
_cell_angle_alpha                 90.00 
_cell_angle_beta                  92.353(6) 
_cell_angle_gamma                 90.00 
_cell_volume                      1059.2(7) 
_cell_formula_units_Z             2 
_cell_measurement_temperature     100(2) 
_cell_measurement_reflns_used     1909 
_cell_measurement_theta_min       3.14 
_cell_measurement_theta_max       27.54 
  
_exptl_crystal_description        Plate 
_exptl_crystal_colour             colourless 
_exptl_crystal_size_max           0.60 
_exptl_crystal_size_mid           0.20 
_exptl_crystal_size_min           0.05 
_exptl_crystal_density_meas       'not measured' 
_exptl_crystal_density_diffrn     1.312 
_exptl_crystal_density_method     'not measured' 
_exptl_crystal_F_000              452 
_exptl_absorpt_coefficient_mu     0.091 
_exptl_absorpt_correction_type    multi-scan 
_exptl_absorpt_correction_T_min   0.9474 
_exptl_absorpt_correction_T_max   0.9955 
_exptl_absorpt_process_details    SADABS 
  
_exptl_special_details 
; 
 ? 
; 
  
_diffrn_ambient_temperature       100(2) 
_diffrn_radiation_wavelength      0.71073 
_diffrn_radiation_type            MoK\a 
_diffrn_radiation_source          'fine-focus sealed tube' 
_diffrn_radiation_monochromator   graphite 
_diffrn_measurement_device_type   'CCD area detector' 
_diffrn_measurement_method        'phi and omega scans' 
_diffrn_detector_area_resol_mean  ? 
_diffrn_standards_number          ? 
_diffrn_standards_interval_count  ? 
_diffrn_standards_interval_time   ? 
_diffrn_standards_decay_%         0 
_diffrn_reflns_number             15332 
_diffrn_reflns_av_R_equivalents   0.0365 
_diffrn_reflns_av_sigmaI/netI     0.0262 
_diffrn_reflns_limit_h_min        -10 
_diffrn_reflns_limit_h_max        10 
_diffrn_reflns_limit_k_min        -8 
_diffrn_reflns_limit_k_max        8 
_diffrn_reflns_limit_l_min        -27 
_diffrn_reflns_limit_l_max        27 
_diffrn_reflns_theta_min          1.94 
_diffrn_reflns_theta_max          27.72 
_reflns_number_total              2451 
_reflns_number_gt                 2071 
_reflns_threshold_expression      >2sigma(I) 
  
_computing_data_collection        'Bruker SMART' 
_computing_cell_refinement        'Bruker SMART' 
_computing_data_reduction         'Bruker SAINT' 
_computing_structure_solution     'SHELXS-97 (Sheldrick, 1990)' 
_computing_structure_refinement   'SHELXL-97 (Sheldrick, 1997)' 
_computing_molecular_graphics     'Bruker SHELXTL' 
_computing_publication_material   'Bruker SHELXTL' 
  
_refine_special_details 
; 
 Refinement of F^2^ against ALL reflections.  The weighted R-factor wR and 
 goodness of fit S are based on F^2^, conventional R-factors R are based 
 on F, with F set to zero for negative F^2^. The threshold expression of 
 F^2^ > 2sigma(F^2^) is used only for calculating R-factors(gt) etc. and is 
 not relevant to the choice of reflections for refinement.  R-factors based 
 on F^2^ are statistically about twice as large as those based on F, and R- 
 factors based on ALL data will be even larger. 
; 
  
_refine_ls_structure_factor_coef  Fsqd 
_refine_ls_matrix_type            full 
_refine_ls_weighting_scheme       calc 
_refine_ls_weighting_details 
 'calc w=1/[\s^2^(Fo^2^)+(0.0335P)^2^+4.6785P] where P=(Fo^2^+2Fc^2^)/3' 
_atom_sites_solution_primary      direct 
_atom_sites_solution_secondary    difmap 
_atom_sites_solution_hydrogens    geom 
_refine_ls_hydrogen_treatment     constr
_refine_ls_extinction_method      none 
_refine_ls_extinction_coef        ? 
_refine_ls_number_reflns          2451 
_refine_ls_number_parameters      136 
_refine_ls_number_restraints      0 
_refine_ls_R_factor_all           0.0750 
_refine_ls_R_factor_gt            0.0662 
_refine_ls_wR_factor_ref          0.2048 
_refine_ls_wR_factor_gt           0.2007 
_refine_ls_goodness_of_fit_ref    1.211 
_refine_ls_restrained_S_all       1.211 
_refine_ls_shift/su_max           0.000 
_refine_ls_shift/su_mean          0.000 
  
loop_ 
 _atom_site_label 
 _atom_site_type_symbol 
 _atom_site_fract_x 
 _atom_site_fract_y 
 _atom_site_fract_z 
 _atom_site_U_iso_or_equiv 
 _atom_site_adp_type 
 _atom_site_occupancy 
 _atom_site_symmetry_multiplicity 
 _atom_site_calc_flag 
 _atom_site_refinement_flags 
 _atom_site_disorder_assembly 
 _atom_site_disorder_group 
C7 C 0.6532(4) 0.7794(5) 0.39583(15) 0.0166(6) Uani 1 1 d . . . 
H7A H 0.5716 0.7822 0.4301 0.020 Uiso 1 1 calc R . . 
H7B H 0.7263 0.6543 0.4025 0.020 Uiso 1 1 calc R . . 
C6 C 0.5607(4) 0.7645(6) 0.33112(16) 0.0199(7) Uani 1 1 d . . . 
H6A H 0.6430 0.7519 0.2973 0.024 Uiso 1 1 calc R . . 
H6B H 0.4898 0.6360 0.3298 0.024 Uiso 1 1 calc R . . 
O1 O 0.4576(3) 0.9473(4) 0.31916(11) 0.0197(5) Uani 1 1 d . . . 
C5 C 0.5572(4) 1.1354(5) 0.32227(15) 0.0173(7) Uani 1 1 d . . . 
H5A H 0.4845 1.2601 0.3142 0.021 Uiso 1 1 calc R . . 
H5B H 0.6407 1.1307 0.2887 0.021 Uiso 1 1 calc R . . 
C4 C 0.6475(4) 1.1577(5) 0.38750(15) 0.0155(6) Uani 1 1 d . . . 
H4A H 0.7162 1.2881 0.3888 0.019 Uiso 1 1 calc R . . 
H4B H 0.5648 1.1672 0.4212 0.019 Uiso 1 1 calc R . . 
N1 N 0.7545(3) 0.9729(4) 0.39824(12) 0.0128(5) Uani 1 1 d . . . 
C1 C 0.8772(4) 0.9827(5) 0.44942(14) 0.0122(6) Uani 1 1 d . . . 
C2 C 0.8676(4) 1.1370(5) 0.49695(14) 0.0115(6) Uani 1 1 d . . . 
H2A H 0.7758 1.2325 0.4946 0.014 Uiso 1 1 calc R . . 
C3 C 0.9855(4) 1.1587(5) 0.54781(14) 0.0122(6) Uani 1 1 d . . . 
N2 N 0.9690(3) 1.3201(4) 0.59500(11) 0.0118(5) Uani 1 1 d . . . 
C11 C 0.8448(4) 1.4863(5) 0.58038(14) 0.0142(6) Uani 1 1 d . . . 
H11A H 0.7306 1.4254 0.5796 0.017 Uiso 1 1 calc R . . 
H11B H 0.8640 1.5476 0.5379 0.017 Uiso 1 1 calc R . . 
C10 C 0.8607(4) 1.6581(5) 0.63114(14) 0.0157(6) Uani 1 1 d . . . 
H10A H 0.9740 1.7213 0.6306 0.019 Uiso 1 1 calc R . . 
H10B H 0.7781 1.7712 0.6211 0.019 Uiso 1 1 calc R . . 
O2 O 0.8332(3) 1.5764(4) 0.69339(10) 0.0169(5) Uani 1 1 d . . . 
C9 C 0.9548(4) 1.4151(5) 0.70782(15) 0.0163(6) Uani 1 1 d . . . 
H9A H 0.9367 1.3581 0.7509 0.020 Uiso 1 1 calc R . . 
H9B H 1.0684 1.4779 0.7081 0.020 Uiso 1 1 calc R . . 
C8 C 0.9445(4) 1.2360(5) 0.65985(14) 0.0140(6) Uani 1 1 d . . . 
H8A H 1.0317 1.1292 0.6707 0.017 Uiso 1 1 calc R . . 
H8B H 0.8336 1.1664 0.6612 0.017 Uiso 1 1 calc R . . 
  
loop_ 
 _atom_site_aniso_label 
 _atom_site_aniso_U_11 
 _atom_site_aniso_U_22 
 _atom_site_aniso_U_33 
 _atom_site_aniso_U_23 
 _atom_site_aniso_U_13 
 _atom_site_aniso_U_12 
C7 0.0149(14) 0.0158(16) 0.0189(15) 0.0000(13) -0.0032(11) -0.0017(12) 
C6 0.0162(15) 0.0194(17) 0.0236(16) -0.0047(13) -0.0054(12) 0.0001(13) 
O1 0.0131(10) 0.0221(13) 0.0233(12) -0.0023(10) -0.0057(9) 0.0000(9) 
C5 0.0159(14) 0.0200(16) 0.0158(14) 0.0023(13) -0.0027(11) 0.0004(13) 
C4 0.0151(14) 0.0147(15) 0.0164(14) -0.0015(12) -0.0028(11) 0.0031(12) 
N1 0.0121(12) 0.0125(13) 0.0135(12) -0.0013(10) -0.0033(9) 0.0005(10) 
C1 0.0119(13) 0.0120(14) 0.0125(13) 0.0022(11) -0.0010(10) -0.0022(11) 
C2 0.0107(13) 0.0107(14) 0.0131(13) 0.0001(11) 0.0001(10) 0.0017(11) 
C3 0.0143(13) 0.0109(14) 0.0114(13) -0.0008(11) 0.0004(10) -0.0015(11) 
N2 0.0140(12) 0.0113(12) 0.0100(11) -0.0010(10) -0.0005(9) 0.0015(10) 
C11 0.0155(14) 0.0136(15) 0.0135(14) -0.0006(12) -0.0007(11) 0.0024(12) 
C10 0.0190(15) 0.0119(15) 0.0164(14) -0.0025(12) 0.0024(11) 0.0010(12) 
O2 0.0204(11) 0.0156(11) 0.0151(11) -0.0006(9) 0.0038(9) 0.0035(9) 
C9 0.0185(15) 0.0158(15) 0.0147(14) -0.0027(12) 0.0007(11) 0.0020(12) 
C8 0.0181(14) 0.0118(14) 0.0122(13) -0.0001(12) 0.0023(11) 0.0010(12) 
  
_geom_special_details 
; 
 All esds (except the esd in the dihedral angle between two l.s. planes) 
 are estimated using the full covariance matrix.  The cell esds are taken 
 into account individually in the estimation of esds in distances, angles 
 and torsion angles; correlations between esds in cell parameters are only 
 used when they are defined by crystal symmetry.  An approximate (isotropic) 
 treatment of cell esds is used for estimating esds involving l.s. planes. 
; 
  
loop_ 
 _geom_bond_atom_site_label_1 
 _geom_bond_atom_site_label_2 
 _geom_bond_distance 
 _geom_bond_site_symmetry_2 
 _geom_bond_publ_flag 
C7 N1 1.467(4) . ? 
C7 C6 1.522(4) . ? 
C7 H7A 0.9900 . ? 
C7 H7B 0.9900 . ? 
C6 O1 1.436(4) . ? 
C6 H6A 0.9900 . ? 
C6 H6B 0.9900 . ? 
O1 C5 1.431(4) . ? 
C5 C4 1.528(4) . ? 
C5 H5A 0.9900 . ? 
C5 H5B 0.9900 . ? 
C4 N1 1.460(4) . ? 
C4 H4A 0.9900 . ? 
C4 H4B 0.9900 . ? 
N1 C1 1.425(4) . ? 
C1 C2 1.399(4) . ? 
C1 C3 1.415(4) 3_776 ? 
C2 C3 1.401(4) . ? 
C2 H2A 0.9500 . ? 
C3 C1 1.415(4) 3_776 ? 
C3 N2 1.432(4) . ? 
N2 C11 1.469(4) . ? 
N2 C8 1.482(4) . ? 
C11 C10 1.523(4) . ? 
C11 H11A 0.9900 . ? 
C11 H11B 0.9900 . ? 
C10 O2 1.430(4) . ? 
C10 H10A 0.9900 . ? 
C10 H10B 0.9900 . ? 
O2 C9 1.432(4) . ? 
C9 C8 1.515(4) . ? 
C9 H9A 0.9900 . ? 
C9 H9B 0.9900 . ? 
C8 H8A 0.9900 . ? 
C8 H8B 0.9900 . ? 
  
loop_ 
 _geom_angle_atom_site_label_1 
 _geom_angle_atom_site_label_2 
 _geom_angle_atom_site_label_3 
 _geom_angle 
 _geom_angle_site_symmetry_1 
 _geom_angle_site_symmetry_3 
 _geom_angle_publ_flag 
N1 C7 C6 109.2(3) . . ? 
N1 C7 H7A 109.8 . . ? 
C6 C7 H7A 109.8 . . ? 
N1 C7 H7B 109.8 . . ? 
C6 C7 H7B 109.8 . . ? 
H7A C7 H7B 108.3 . . ? 
O1 C6 C7 111.1(3) . . ? 
O1 C6 H6A 109.4 . . ? 
C7 C6 H6A 109.4 . . ? 
O1 C6 H6B 109.4 . . ? 
C7 C6 H6B 109.4 . . ? 
H6A C6 H6B 108.0 . . ? 
C5 O1 C6 110.3(2) . . ? 
O1 C5 C4 111.0(3) . . ? 
O1 C5 H5A 109.4 . . ? 
C4 C5 H5A 109.4 . . ? 
O1 C5 H5B 109.4 . . ? 
C4 C5 H5B 109.4 . . ? 
H5A C5 H5B 108.0 . . ? 
N1 C4 C5 108.5(3) . . ? 
N1 C4 H4A 110.0 . . ? 
C5 C4 H4A 110.0 . . ? 
N1 C4 H4B 110.0 . . ? 
C5 C4 H4B 110.0 . . ? 
H4A C4 H4B 108.4 . . ? 
C1 N1 C4 117.5(3) . . ? 
C1 N1 C7 115.1(2) . . ? 
C4 N1 C7 110.1(2) . . ? 
C2 C1 C3 118.4(3) . 3_776 ? 
C2 C1 N1 120.8(3) . . ? 
C3 C1 N1 120.8(3) 3_776 . ? 
C1 C2 C3 123.8(3) . . ? 
C1 C2 H2A 118.1 . . ? 
C3 C2 H2A 118.1 . . ? 
C2 C3 C1 117.7(3) . 3_776 ? 
C2 C3 N2 121.3(3) . . ? 
C1 C3 N2 121.0(3) 3_776 . ? 
C3 N2 C11 116.5(2) . . ? 
C3 N2 C8 113.5(2) . . ? 
C11 N2 C8 109.6(2) . . ? 
N2 C11 C10 109.1(2) . . ? 
N2 C11 H11A 109.9 . . ? 
C10 C11 H11A 109.9 . . ? 
N2 C11 H11B 109.9 . . ? 
C10 C11 H11B 109.9 . . ? 
H11A C11 H11B 108.3 . . ? 
O2 C10 C11 111.8(3) . . ? 
O2 C10 H10A 109.3 . . ? 
C11 C10 H10A 109.3 . . ? 
O2 C10 H10B 109.3 . . ? 
C11 C10 H10B 109.3 . . ? 
H10A C10 H10B 107.9 . . ? 
C10 O2 C9 108.8(2) . . ? 
O2 C9 C8 111.9(3) . . ? 
O2 C9 H9A 109.2 . . ? 
C8 C9 H9A 109.2 . . ? 
O2 C9 H9B 109.2 . . ? 
C8 C9 H9B 109.2 . . ? 
H9A C9 H9B 107.9 . . ? 
N2 C8 C9 109.7(3) . . ? 
N2 C8 H8A 109.7 . . ? 
C9 C8 H8A 109.7 . . ? 
N2 C8 H8B 109.7 . . ? 
C9 C8 H8B 109.7 . . ? 
H8A C8 H8B 108.2 . . ? 
  
loop_ 
 _geom_torsion_atom_site_label_1 
 _geom_torsion_atom_site_label_2 
 _geom_torsion_atom_site_label_3 
 _geom_torsion_atom_site_label_4 
 _geom_torsion 
 _geom_torsion_site_symmetry_1 
 _geom_torsion_site_symmetry_2 
 _geom_torsion_site_symmetry_3 
 _geom_torsion_site_symmetry_4 
 _geom_torsion_publ_flag 
N1 C7 C6 O1 -57.6(3) . . . . ? 
C7 C6 O1 C5 57.8(3) . . . . ? 
C6 O1 C5 C4 -58.8(3) . . . . ? 
O1 C5 C4 N1 59.4(3) . . . . ? 
C5 C4 N1 C1 166.5(3) . . . . ? 
C5 C4 N1 C7 -59.2(3) . . . . ? 
C6 C7 N1 C1 -165.8(3) . . . . ? 
C6 C7 N1 C4 58.7(3) . . . . ? 
C4 N1 C1 C2 16.0(4) . . . . ? 
C7 N1 C1 C2 -116.1(3) . . . . ? 
C4 N1 C1 C3 -161.9(3) . . . 3_776 ? 
C7 N1 C1 C3 66.0(4) . . . 3_776 ? 
C3 C1 C2 C3 -0.7(5) 3_776 . . . ? 
N1 C1 C2 C3 -178.6(3) . . . . ? 
C1 C2 C3 C1 0.7(5) . . . 3_776 ? 
C1 C2 C3 N2 179.9(3) . . . . ? 
C2 C3 N2 C11 -12.4(4) . . . . ? 
C1 C3 N2 C11 166.9(3) 3_776 . . . ? 
C2 C3 N2 C8 116.3(3) . . . . ? 
C1 C3 N2 C8 -64.5(4) 3_776 . . . ? 
C3 N2 C11 C10 -172.6(3) . . . . ? 
C8 N2 C11 C10 56.9(3) . . . . ? 
N2 C11 C10 O2 -59.7(3) . . . . ? 
C11 C10 O2 C9 59.7(3) . . . . ? 
C10 O2 C9 C8 -59.0(3) . . . . ? 
C3 N2 C8 C9 171.4(2) . . . . ? 
C11 N2 C8 C9 -56.5(3) . . . . ? 
O2 C9 C8 N2 58.1(3) . . . . ? 
  
_diffrn_measured_fraction_theta_max    0.982 
_diffrn_reflns_theta_full              27.72 
_diffrn_measured_fraction_theta_full   0.982 
_refine_diff_density_max    0.468 
_refine_diff_density_min   -0.364 
_refine_diff_density_rms    0.089 
